# Supplementary material
Source: Springer Nature journal article supplement (https://www.springermedizin.de/resource/supplementary/12998_2010_136_MOESM1_ESM.pdf/9623636)

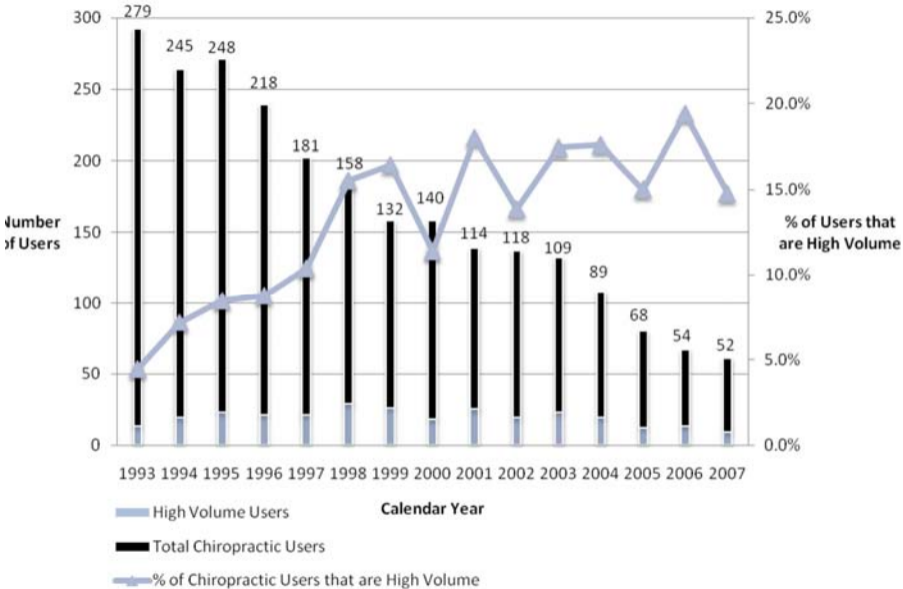

Supplement: MOESM1 [file 9623636]
